# Supplementary material for: The effectiveness and sustainability of peer support interventions for persons living with HIV: a realist synthesis
Source: HighWire-hosted journal article supplement (doi:10.1136/bmjgh-2022-010966), 2023-02-01
Supplement: bmjgh-2022-010966supp001_data_supplement.pdf [file bmjgh-2022-010966supp001_data_supplement.pdf]

**Appendix I****PubMed**

Search time: 2022-5-29

| Search | Query                                                                                                                                                                                                                                                                                                    | Items found |
|--------|----------------------------------------------------------------------------------------------------------------------------------------------------------------------------------------------------------------------------------------------------------------------------------------------------------|-------------|
| #1     | ("HIV"[Mesh]) OR "HIV Infections"[Mesh] OR "Acquired Immunodeficiency Syndrome"[Mesh]                                                                                                                                                                                                                    | 339,952     |
| #2     | HIV[Title/Abstract] OR AIDS[Title/Abstract] OR PLWHA[Title/Abstract] OR PLWH[Title/Abstract] OR human immunodeficiency virus[Title/Abstract] OR acquired immunodeficiency syndrome[Title/Abstract] OR human immunodeficiency virus[Title/Abstract] OR acquired immunodeficiency syndrome[Title/Abstract] | 441,361     |
| #3     | #1 OR #2                                                                                                                                                                                                                                                                                                 | 479,314     |
| #4     | "Peer Group"[Mesh]                                                                                                                                                                                                                                                                                       | 23,730      |
| #5     | peer?[Title/Abstract]                                                                                                                                                                                                                                                                                    | 85,549      |
| #6     | support[Title/Abstract] OR navigator?[Title/Abstract] OR counselor?[Title/Abstract] OR educator?[Title/Abstract] OR health worker?[Title/Abstract] OR volunteer?[Title/Abstract]                                                                                                                         | 1,196,013   |
| #7     | #5 AND #6                                                                                                                                                                                                                                                                                                | 19,127      |
| #8     | #4 OR #7                                                                                                                                                                                                                                                                                                 | 38,640      |
| #9     | #3 AND #8<br>Filters applied: Full text, Humans, English, Aged: 19+ years, from 1996/1/1 - 2022/5/29                                                                                                                                                                                                     | 1,039       |

**EMBASE (Ovid)**

Search time: 2022-5-29

| Search | Query                                                                                                    | Items found |
|--------|----------------------------------------------------------------------------------------------------------|-------------|
| #1     | (HIV or AIDS or PLWHA or PLWH or human immunodeficiency virus or acquired immunodeficiency syndrome).ab. | 458,704     |
| #2     | (HIV or AIDS or PLWHA or PLWH or human immunodeficiency virus or acquired immunodeficiency syndrome).ti. | 356,362     |
| #3     | (HIV or AIDS or PLWHA or PLWH or human immunodeficiency virus or acquired immunodeficiency syndrome).sh. | 128,319     |
| #4     | #1 or #2 or #3                                                                                           | 10,607      |
| #5     | peer?.ab.                                                                                                | 130,927     |
| #6     | peer?.ti.                                                                                                | 22,345      |
| #7     | peer?.sh.                                                                                                | 76          |
| #8     | #5 or #6 or #7                                                                                           | 138,267     |
| #9     | (support or navigator? or counselor? or educator? or health worker? or volunteer?).ab.                   | 1,741,245   |
| #10    | (support or navigator? or counselor? or educator? or health worker? or volunteer?).ti.                   | 165,108     |
| #11    | (support or navigator? or counselor? or educator? or health worker? or volunteer?).sh.                   | 63,016      |
| #12    | #9 or #10 or #11                                                                                         | 1,807,592   |
| #13    | #4 and #8 and #12<br>Limit #13 to (full text and human and english language and yr="1996 -Current")      | 145         |

**CINAHL (EBSCO)**

Search time: 2022-5-29

| Search | Query | Items found |
|--------|-------|-------------|
|--------|-------|-------------|

|    |                                                                                                                                                                                                                                                                                                                                                                                                                                                |        |
|----|------------------------------------------------------------------------------------------------------------------------------------------------------------------------------------------------------------------------------------------------------------------------------------------------------------------------------------------------------------------------------------------------------------------------------------------------|--------|
| #1 | TI ( HIV OR AIDS OR PLWHA OR PLWH OR human immunodeficiency virus OR acquired immunodeficiency syndrome ) OR AB ( HIV OR AIDS OR PLWHA OR PLWH OR human immunodeficiency virus OR acquired immunodeficiency syndrome ) OR SU ( HIV OR AIDS OR PLWHA OR PLWH OR human immunodeficiency virus OR acquired immunodeficiency syndrome )<br>Limiters - Full Text; Published Date: 19960101-20220531; English Language; Human; Age Groups: All Adult | 15,438 |
| #2 | TI peer? OR AB peer? OR SU peer?<br>Limiters - Full Text; Published Date: 19960101-20220531; English Language; Human; Age Groups: All Adult                                                                                                                                                                                                                                                                                                    | 4,111  |
| #3 | TI ( support OR navigator? OR counselor? OR educator? OR health worker? OR volunteer? ) OR AB ( support OR navigator? OR counselor? OR educator? OR health worker? OR volunteer? ) OR SU ( support OR navigator? OR counselor? OR educator? OR health worker? OR volunteer? )<br>Limiters - Full Text; Published Date: 19960101-20220531; English Language; Human; Age Groups: All Adult                                                       | 47,814 |
| #4 | #1 AND #2 AND #3                                                                                                                                                                                                                                                                                                                                                                                                                               | 205    |

### Web of Science Core Collection

Search time: 2022-5-29

| Search | Query                                                                                                                                                                                                                                                                                                                                                | Items found |
|--------|------------------------------------------------------------------------------------------------------------------------------------------------------------------------------------------------------------------------------------------------------------------------------------------------------------------------------------------------------|-------------|
| #1     | TS=(HIV OR AIDS OR PLWHA OR PLWH OR human immunodeficiency virus OR acquired immunodeficiency syndrome)                                                                                                                                                                                                                                              | 1,018,629   |
| #2     | TS=(peer*)                                                                                                                                                                                                                                                                                                                                           | 255,555     |
| #3     | TS=(support OR navigator* OR counselor* OR educator* OR health worker* OR volunteer*)                                                                                                                                                                                                                                                                | 3,798,916   |
| #4     | #2 AND #3                                                                                                                                                                                                                                                                                                                                            | 59,792      |
| #5     | (#1 AND #4) AND DOP=(1996-01-01/2022-05-29)<br>Refined by: Languages: English; Research Areas: Infectious Diseases or Health Care Sciences Services or Psychology or Biomedical Social Sciences or Education Educational Research or Nursing or Social Sciences Other Topics or Social Work or Sociology or Public Environmental Occupational Health | 2,567       |

### ProQuest Dissertations and Theses Global

Search time: 2022-5-29

| Search | Query                                                                                                                                                                                                                                                                                                                                                                                                                                                           | Items found |
|--------|-----------------------------------------------------------------------------------------------------------------------------------------------------------------------------------------------------------------------------------------------------------------------------------------------------------------------------------------------------------------------------------------------------------------------------------------------------------------|-------------|
| #1     | ti(HIV OR AIDS OR PLWHA OR PLWH OR human immunodeficiency virus OR acquired immunodeficiency syndrome) OR ab(HIV OR AIDS OR PLWHA OR PLWH OR human immunodeficiency virus OR acquired immunodeficiency syndrome) OR su(HIV OR AIDS OR PLWHA OR PLWH OR human immunodeficiency virus OR acquired immunodeficiency syndrome)<br>Refined by: Languages: English; Full text; From 1996-01-01 to 2022-05-29; Publication Types: Dissertation; Document Types: These. | 62,283      |
| #2     | ti(peer?) OR ab(peer?) OR su(peer?)<br>Refined by: Languages: English; Full text; From 1996-01-01 to 2022-05-29; Publication Types:                                                                                                                                                                                                                                                                                                                             | 41,332      |

|    |                                                                                                                                                                                                                                                                                                                                                                                                           |         |
|----|-----------------------------------------------------------------------------------------------------------------------------------------------------------------------------------------------------------------------------------------------------------------------------------------------------------------------------------------------------------------------------------------------------------|---------|
|    | Dissertation; Document Types: These.                                                                                                                                                                                                                                                                                                                                                                      |         |
| #3 | ti(support OR navigator? OR counselor? OR educator? OR health worker? OR volunteer?) OR ab(support OR navigator? OR counselor? OR educator? OR health worker? OR volunteer?) OR su(support OR navigator? OR counselor? OR educator? OR health worker? OR volunteer?)<br>Refined by: Languages: English; Full text; From 1996-01-01 to 2022-05-29; Publication Types: Dissertation; Document Types: These. | 339,662 |
| #5 | #1 AND #2 AND #3                                                                                                                                                                                                                                                                                                                                                                                          | 746     |

## CNKI

Search time: 2022-5-29

| Search | Query                                                                         | Items found |
|--------|-------------------------------------------------------------------------------|-------------|
| #1     | TKA="人类免疫缺陷病毒 + 获得性免疫缺陷综合征 + 艾滋病 + HIV + AIDS"                                | 131,472     |
| #2     | TKA="同伴"                                                                      | 43,451      |
| #3     | TKA="支持 + 教育 + 志愿者"                                                           | 7,666,443   |
| #4     | TKA="新生儿 + 幼儿 + 婴幼儿 + 儿童 + 青少年"                                               | 1,598,299   |
| #5     | (#1 AND #2 AND #3) NOT #4<br>Date: 1996-01-01 to 2022-05-29; Language:Chinese | 1,344       |

## WanFang

Search time: 2022-5-29

| Search | Query                                                                    | Items found |
|--------|--------------------------------------------------------------------------|-------------|
| #1     | 摘要:"人类免疫缺陷病毒 or 获得性免疫缺陷综合征 or 艾滋病 or HIV or AIDS "                       | 128,695     |
| #2     | 摘要:"同伴"                                                                  | 34,454      |
| #3     | 摘要:"支持 or 教育 or 志愿者"                                                     | 6,863,479   |
| #4     | 摘要:"新生儿 or 幼儿 or 婴幼儿 or 儿童 or 青少年"                                       | 1,320,416   |
| #5     | (#1 AND #2 AND #3) NOT #4<br>Date:2002-2022; Language:Chinese; Full text | 299         |
