# Supplementary material for: The effectiveness and sustainability of peer support interventions for persons living with HIV: a realist synthesis
Source: HighWire-hosted journal article supplement (doi:10.1136/bmjgh-2022-010966), 2023-02-01
Supplement: bmjgh-2022-010966supp002_data_supplement.pdf [file bmjgh-2022-010966supp002_data_supplement.pdf]

## Appendix II

| Source | Link                                                                                                                                                                                                                                            | Title                                                                                                          |
|--------|-------------------------------------------------------------------------------------------------------------------------------------------------------------------------------------------------------------------------------------------------|----------------------------------------------------------------------------------------------------------------|
| nhivna | <a href="https://www.nhivna.org/news-detail.php?news_id=50">https://www.nhivna.org/news-detail.php?news_id=50</a>                                                                                                                               | <a href="#">Peer navigators improve linkage to HIV care and retention in care in South African study</a>       |
|        | <a href="https://www.nhivna.org/news-detail.php?news_id=106">https://www.nhivna.org/news-detail.php?news_id=106</a>                                                                                                                             | Peer workers improve drug users' engagement with HIV care in Ukraine                                           |
|        | <a href="https://www.nhivna.org/news-detail.php?news_id=262">https://www.nhivna.org/news-detail.php?news_id=262</a>                                                                                                                             | Peer or community interventions improve outcomes for mothers with HIV                                          |
| BHIVA  | <a href="https://www.bhiva.org/news-detail.php?news_id=1568">https://www.bhiva.org/news-detail.php?news_id=1568</a>                                                                                                                             | <a href="#">Peer support and text reminders lead to only transient improvements in HIV treatment adherence</a> |
|        | <a href="https://www.bhiva.org/news-detail.php?news_id=3706">https://www.bhiva.org/news-detail.php?news_id=3706</a>                                                                                                                             | Peer support is crucial for many people living with HIV                                                        |
| napwha | <a href="https://napwha.org.au/the-future-of-peer-practice/">https://napwha.org.au/the-future-of-peer-practice/</a>                                                                                                                             | Webinar: The future of peer practice                                                                           |
|        | <a href="https://napwha.org.au/resource/australian-hiv-peer-support-standards/">https://napwha.org.au/resource/australian-hiv-peer-support-standards/</a>                                                                                       | Australian HIV Peer Support Standards                                                                          |
| CATIE  | <a href="https://www.catie.ca/programming-connection/peer-navigation-services">https://www.catie.ca/programming-connection/peer-navigation-services</a>                                                                                         | Peer Navigation Services                                                                                       |
|        | <a href="https://www.catie.ca/practice-guidelines-in-peer-health-navigation-for-people-living-with-hiv">https://www.catie.ca/practice-guidelines-in-peer-health-navigation-for-people-living-with-hiv</a>                                       | Practice Guidelines in Peer Health Navigation for People Living with HIV                                       |
|        | <a href="https://www.catie.ca/resource/building-blocks-to-peer-program-success-a-toolkit-for-developing-hiv-peer-programs">https://www.catie.ca/resource/building-blocks-to-peer-program-success-a-toolkit-for-developing-hiv-peer-programs</a> | Building Blocks to Peer Program Success: A toolkit for developing HIV peer programs                            |
|        | <a href="https://www.catie.ca/peer-health-navigation-gipa-mepa-and-your-organization">https://www.catie.ca/peer-health-navigation-gipa-mepa-and-your-organization</a>                                                                           | Peer Health Navigation: GIPA, MEPA and Your Organization                                                       |

---

|                                                                                                                                                                                                                                                                           |                                                                                                                                                          |
|---------------------------------------------------------------------------------------------------------------------------------------------------------------------------------------------------------------------------------------------------------------------------|----------------------------------------------------------------------------------------------------------------------------------------------------------|
| <a href="https://www.catie.ca/peer-health-navigation-scope-of-practice-roles-and-responsibilities">https://www.catie.ca/peer-health-navigation-scope-of-practice-roles-and-responsibilities</a>                                                                           | Peer health navigation: scope of practice, roles and responsibilities                                                                                    |
| <a href="https://www.catie.ca/peer-health-navigation-mental-health-implications-of-working-as-a-peer">https://www.catie.ca/peer-health-navigation-mental-health-implications-of-working-as-a-peer</a>                                                                     | Peer health navigation: mental health implications of working as a peer                                                                                  |
| <a href="https://www.catie.ca/hiv-peer-health-navigation-moving-programs-forward">https://www.catie.ca/hiv-peer-health-navigation-moving-programs-forward</a>                                                                                                             | HIV peer health navigation: Moving programs forward                                                                                                      |
| <a href="https://www.catie.ca/resource/the-role-of-peers-in-linkage-engagement-and-retention-in-hiv-care">https://www.catie.ca/resource/the-role-of-peers-in-linkage-engagement-and-retention-in-hiv-care</a>                                                             | The role of peers in linkage, engagement, and retention in HIV care                                                                                      |
| <a href="https://www.catie.ca/prevention-in-focus/practice-guidelines-in-peer-health-navigation-for-people-living-with-hiv-a-new">https://www.catie.ca/prevention-in-focus/practice-guidelines-in-peer-health-navigation-for-people-living-with-hiv-a-new</a>             | Practice Guidelines in Peer Health Navigation for People Living with HIV: A new program development resource for community-based organizations (Part 2)  |
| <a href="https://www.catie.ca/programming-connection/peer-to-peer-program">https://www.catie.ca/programming-connection/peer-to-peer-program</a>                                                                                                                           | Peer-to-Peer Program                                                                                                                                     |
| <a href="https://www.catie.ca/prevention-in-focus/practice-guidelines-for-peer-health-navigation-for-people-living-with-hiv-a-new">https://www.catie.ca/prevention-in-focus/practice-guidelines-for-peer-health-navigation-for-people-living-with-hiv-a-new</a>           | Practice Guidelines for Peer Health Navigation for People Living with HIV: A new program development resource for community-based organizations (Part 1) |
| <a href="https://www.interiorhealth.ca/sites/default/files/PDFS/getting-started-guide-to-develop-and-deliver-peer-support-services.pdf">https://www.interiorhealth.ca/sites/default/files/PDFS/getting-started-guide-to-develop-and-deliver-peer-support-services.pdf</a> | Getting started: A guide to develop and deliver peer support services                                                                                    |
| <a href="https://www.catie.ca/resource/training-peer-mentors-facilitation-guide">https://www.catie.ca/resource/training-peer-mentors-facilitation-guide</a>                                                                                                               | Training peer mentors: Facilitation guide                                                                                                                |
| <a href="https://www.catie.ca/resource/becoming-a-peer-mentor-participant-training-guide">https://www.catie.ca/resource/becoming-a-peer-mentor-participant-training-guide</a>                                                                                             | Becoming a peer mentor: Participant training guide                                                                                                       |

---
